# Supplementary material for: Association of Circulating Branched-Chain Amino Acids with Cardiovascular Diseases: A Mendelian Randomization Study
Source: MDPI journal article supplement (doi:10.3390/nu15071580), 2023-03-24
Supplement: s1 [file s1]

**Table S1. Information of exposure and outcome data sources.**

| Study/Consortium | Exposure/Outcome          | Cases | Controls | Sample size | Population | First author (Year) |
|------------------|---------------------------|-------|----------|-------------|------------|---------------------|
| UK biobank       | Total-BCAA                | NA    | NA       | 115047      | European   | Borges CM (2020)    |
| UK biobank       | Valine                    | NA    | NA       | 115048      | European   | Borges CM (2020)    |
| UK biobank       | Leucine                   | NA    | NA       | 115074      | European   | Borges CM (2020)    |
| UK biobank       | Isoleucine                | NA    | NA       | 115075      | European   | Borges CM (2020)    |
| FinnGen biobank  | Peripheral artery disease | 7098  | 206541   | 213639      | European   | 2021                |
| FinnGen biobank  | Transient ischemic attack | 8835  | 202223   | 211058      | European   | 2021                |
| EBI databases    | Small vessel stroke       | 5386  | 192662   | 198048      | European   | Malik R (2018)      |
| EBI databases    | Large artery stroke       | 4373  | 406111   | 410484      | European   | Malik R (2018)      |
| EBI databases    | Cardioembolic stroke      | 7193  | 406111   | 413304      | European   | Malik R (2018)      |
| EBI databases    | Ischemic stroke           | 34217 | 406111   | 440328      | European   | Malik R (2018)      |
| FinnGen biobank  | Subarachnoid hemorrhage   | 1338  | 201230   | 202568      | European   | 2021                |
| FinnGen biobank  | Intracerebral hemorrhage  | 1687  | 201146   | 202833      | European   | 2021                |
| FinnGen biobank  | Stroke                    | 18661 | 162201   | 180862      | European   | 2021                |
| FinnGen biobank  | Heart failure             | 13087 | 195091   | 208178      | European   | 2021                |
| EBI databases    | Coronary artery disease   | 42096 | 361      | 42457       | European   | Nikpay M (2015)     |
| MRC-IEU          | Angina                    | 18168 | 187840   | 206008      | European   | 2021                |
| EBI databases    | Myocardial infarction     | 2680  | 14125    | 16805       | European   | 2021                |

**Table S2. The total BCAA-related genetic variants used for the MR analyses.**

| Exposure | SNP         | Chr | Position      | Effect allele | Other allele | EAF    | Beta    | SE     | <i>P</i> value | Nearby gene  | R <sup>2</sup> | F-statistic |
|----------|-------------|-----|---------------|---------------|--------------|--------|---------|--------|----------------|--------------|----------------|-------------|
| BCAA     | rs1128249   | 2   | 16552862<br>4 | T             | G            | 0.3920 | -0.0348 | 0.0041 | 2.00E-17       | COBLL1       | 0.000627       | 72.15       |
| BCAA     | rs10018448  | 4   | 89225171      | G             | A            | 0.5353 | 0.6965  | 0.0040 | 7.29E-128      | PPM1K-DT     | 0.005030       | 578.67      |
| BCAA     | rs2977929   | 8   | 76454025      | T             | C            | 0.1968 | 0.0289  | 0.0050 | 1.10E-8        | HNF4G        | 0.000284       | 32.71       |
| BCAA     | rs17096421  | 10  | 88820592      | T             | A            | 0.0564 | 0.0537  | 0.0088 | 9.70E-10       | GLUD1        | 0.000325       | 37.38       |
| BCAA     | rs2638315   | 12  | 56865056      | C             | G            | 0.1825 | 0.0439  | 0.0052 | 1.80E-17       | GLS2, SPRYD4 | 0.000629       | 72.36       |
| BCAA     | rs36181536  | 12  | 12252826<br>3 | C             | T            | 0.6735 | -0.0263 | 0.0043 | 7.00E-10       | MLXIP        | 0.000331       | 38.03       |
| BCAA     | rs6499561   | 16  | 72148404      | G             | A            | 0.3621 | 0.0239  | 0.0042 | 1.30E-08       | NA           | 0.000280       | 32.26       |
| BCAA     | rs117643180 | 17  | 7185779       | A             | C            | 0.0259 | -0.1494 | 0.0127 | 3.80E-32       | SLC2A4       | 0.001211       | 139.29      |
| BCAA     | rs12974412  | 19  | 14151809      | G             | A            | 0.7800 | -0.0280 | 0.0050 | 1.80E-08       | IL27RA       | 0.000276       | 31.73       |
| BCAA     | rs4801776   | 19  | 49304215      | T             | C            | 0.2992 | -0.0393 | 0.0045 | 1.30E-18       | BCAT2        | 0.000674       | 77.55       |
| BCAA     | rs5747934   | 22  | 18915282      | T             | C            | 0.0423 | -0.0050 | 0.0100 | 1.20E-09       | PRODH        | 0.000321       | 36.96       |

Abbreviations: SNP, single-nucleotide polymorphism; Chr, chromosome; EAF, effect allele frequency; SE, standard error.

**Table S3. The Valine-related genetic variants used for the MR analyses.**

| Exposure | SNP         | Chr | Position      | Effect allele | Other allele | EAF    | Beta    | SE     | P value   | Nearby gene            | R <sup>2</sup> | F-statistic |
|----------|-------------|-----|---------------|---------------|--------------|--------|---------|--------|-----------|------------------------|----------------|-------------|
| Valine   | rs1128249   | 2   | 16552862<br>4 | T             | G            | 0.3920 | -0.0351 | 0.0041 | 1.50E-17  | NA                     | 0.000631       | 72.65       |
| Valine   | rs10018448  | 4   | 89225171      | G             | A            | 0.5353 | 0.1046  | 0.0040 | 2.30E-148 | PPM1K-DT               | 0.005849       | 672.97      |
| Valine   | rs12648408  | 4   | 89244131      | A             | G            | 0.0508 | -0.0509 | 0.0093 | 4.20E-08  | PPM1K-DT               | 0.000261       | 30.04       |
| Valine   | rs61587941  | 5   | 55814890      | A             | G            | 0.0512 | -0.0502 | 0.0091 | 3.40E-08  | C5orf67                | 0.000265       | 30.45       |
| Valine   | rs6941263   | 6   | 10916209<br>4 | A             | T            | 0.1878 | -0.0285 | 0.0052 | 3.40E-08  | NA                     | 0.000265       | 30.46       |
| Valine   | rs17096421  | 10  | 88820592      | T             | A            | 0.0564 | 0.0625  | 0.0088 | 1.40E-12  | GLUD1                  | 0.000436       | 50.15       |
| Valine   | rs36181536  | 12  | 12252826<br>3 | C             | T            | 0.6735 | -0.0318 | 0.0043 | 1.30E-13  | MLXIP                  | 0.000476       | 54.81       |
| Valine   | rs2638315   | 12  | 56865056      | C             | G            | 0.1825 | 0.0426  | 0.0052 | 2.20E-16  | GLS2,SPRYD4            | 0.000586       | 67.39       |
| Valine   | rs2274815   | 14  | 10271805<br>2 | A             | G            | 0.2050 | 0.0280  | 0.0050 | 1.80E-08  | MOK                    | 0.000275       | 31.68       |
| Valine   | rs117643180 | 17  | 7185779       | A             | C            | 0.0259 | -0.1748 | 0.0127 | 6.30E-43  | SLC2A4                 | 0.001640       | 188.64      |
| Valine   | rs8071084   | 17  | 79634162      | G             | T            | 0.1617 | -0.0323 | 0.0055 | 3.10E-09  | OXLD1,CCDC13<br>7      | 0.000305       | 35.11       |
| Valine   | rs35230038  | 19  | 49300431      | A             | G            | 0.0454 | -0.0984 | 0.0098 | 1.10E-23  | BCAT2                  | 0.000875       | 100.62      |
| Valine   | rs117048185 | 19  | 49309776      | C             | G            | 0.0173 | 0.1899  | 0.0154 | 8.70E-35  | BCAT2,LOC105<br>372432 | 0.001316       | 151.37      |
| Valine   | rs12974412  | 19  | 14151809      | G             | A            | 0.7800 | -0.0272 | 0.0050 | 4.80E-08  | IL27RA                 | 0.000259       | 29.81       |
| Valine   | rs837616    | 19  | 49365588      | G             | A            | 0.2915 | -0.0250 | 0.0044 | 1.60E-08  | PLEKHA4                | 0.000278       | 31.96       |
| Valine   | rs2238732   | 22  | 18915347      | T             | C            | 0.0423 | -0.0621 | 0.0100 | 5.80E-10  | PRODH                  | 0.000334       | 38.38       |

Abbreviations: SNP, single-nucleotide polymorphism; Chr, chromosome; EAF, effect allele frequency; SE, standard error.

**Table S4. The leucine-related genetic variants used for the MR analyses.**

| Exposure | SNP         | Chr | Position  | Effect allele | Other allele | EAF    | Beta    | SE     | P value   | Nearby gene | R <sup>2</sup> | F-statistic |
|----------|-------------|-----|-----------|---------------|--------------|--------|---------|--------|-----------|-------------|----------------|-------------|
| Leucine  | rs11166420  | 1   | 100702216 | A             | T            | 0.9044 | -0.0380 | 0.0067 | 1.70E-08  | DBT         | 0.000276       | 31.77       |
| Leucine  | rs13389219  | 2   | 165528876 | T             | C            | 0.3925 | -0.0321 | 0.0041 | 2.30E-15  | COBLL1      | 0.000545       | 62.75       |
| Leucine  | rs150277164 | 4   | 89258580  | A             | G            | 0.0142 | 0.1159  | 0.0168 | 5.20E-12  | PPM1K-DT    | 0.000414       | 47.62       |
| Leucine  | rs10018448  | 4   | 89225171  | G             | A            | 0.5353 | 0.0878  | 0.0040 | 4.30E-108 | PPM1K-DT    | 0.004239       | 487.81      |
| Leucine  | rs2977929   | 8   | 76454025  | T             | C            | 0.1968 | 0.0282  | 0.0050 | 1.80E-08  | HNF4G       | 0.000276       | 31.74       |
| Leucine  | rs2638315   | 12  | 56865056  | C             | G            | 0.1825 | 0.0409  | 0.0051 | 1.20E-15  | GLS2,SPRYD4 | 0.000557       | 64.06       |
| Leucine  | rs9930957   | 16  | 72149923  | T             | C            | 0.1598 | 0.0525  | 0.0054 | 2.10E-22  | NA          | 0.000824       | 94.76       |
| Leucine  | rs117643180 | 17  | 7185779   | A             | C            | 0.0259 | -0.1184 | 0.0125 | 4.00E-21  | SLC2A4      | 0.000773       | 89.00       |
| Leucine  | rs12974412  | 19  | 14151809  | G             | A            | 0.7800 | -0.0291 | 0.0049 | 3.30E-09  | IL27RA      | 0.000304       | 35.01       |
| Leucine  | rs4801776   | 19  | 49304215  | T             | C            | 0.2992 | -0.0324 | 0.0044 | 2.40E-13  | BCAT2       | 0.000466       | 53.61       |
| Leucine  | rs5747934   | 22  | 18915282  | T             | C            | 0.0423 | -0.0568 | 0.0099 | 8.60E-09  | PRODH       | 0.000288       | 33.14       |

Abbreviations: SNP, single-nucleotide polymorphism; Chr, chromosome; EAF, effect allele frequency; SE, standard error.

**Table S5. The Isoleucine-related genetic variants used for the MR analyses.**

| Exposure   | SNP         | Chr | Position      | Effect allele | Other allele | EAF    | Beta    | SE     | <i>P</i> value | Nearby gene          | R <sup>2</sup> | F-statistic |
|------------|-------------|-----|---------------|---------------|--------------|--------|---------|--------|----------------|----------------------|----------------|-------------|
| Isoleucine | rs10184004  | 2   | 16550838<br>9 | T             | C            | 0.4061 | -0.0299 | 0.0041 | 4.00E-13       | NA                   | 0.000457       | 52.64       |
| Isoleucine | rs10018448  | 4   | 89225171      | G             | A            | 0.5353 | 0.0666  | 0.0041 | 4.10E-60       | PPM1K-DT             | 0.002324       | 267.44      |
| Isoleucine | rs2941456   | 8   | 76443463      | A             | G            | 0.1985 | 0.0293  | 0.0051 | 9.10E-09       | HNF4G                | 0.000287       | 33.02       |
| Isoleucine | rs7302925   | 12  | 56861458      | G             | A            | 0.8011 | -0.0413 | 0.0051 | 3.60E-16       | SPRYD4               | 0.000577       | 66.43       |
| Isoleucine | rs12325419  | 16  | 70368909      | A             | G            | 0.1153 | -0.0743 | 0.0063 | 1.10E-31       | DDX19B,DDX19<br>A-DT | 0.001192       | 137.21      |
| Isoleucine | rs117643180 | 17  | 7185779       | A             | C            | 0.0259 | -0.1014 | 0.0128 | 2.90E-15       | SLC2A4               | 0.000542       | 62.34       |
| Isoleucine | rs545587    | 19  | 49319664      | C             | A            | 0.5148 | 0.0366  | 0.0041 | 2.30E-19       | HSD17B14             | 0.000704       | 80.99       |

Abbreviations: SNP, single-nucleotide polymorphism; Chr, chromosome; EAF, effect allele frequency; SE, standard error.

**Figure S1. Forest plot of cardiovascular diseases causally associated with circulating total BCAAs levels.**

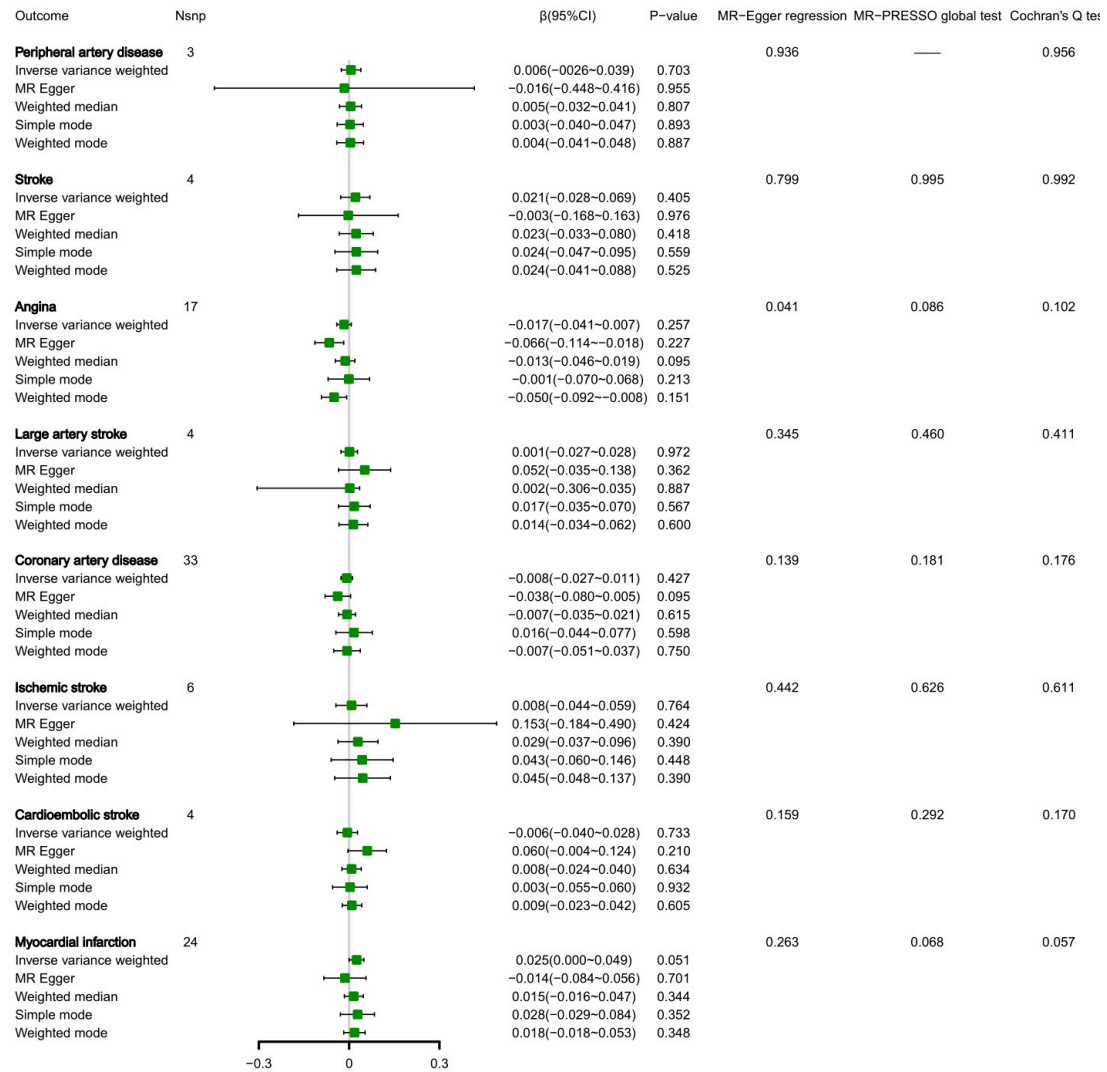

Abbreviations:  $\beta$ , beta value; CI, confidence interval, Nsnp, number of the SNPs.

**Figure S2. Forest plot of cardiovascular diseases causally associated with circulating valine levels.**

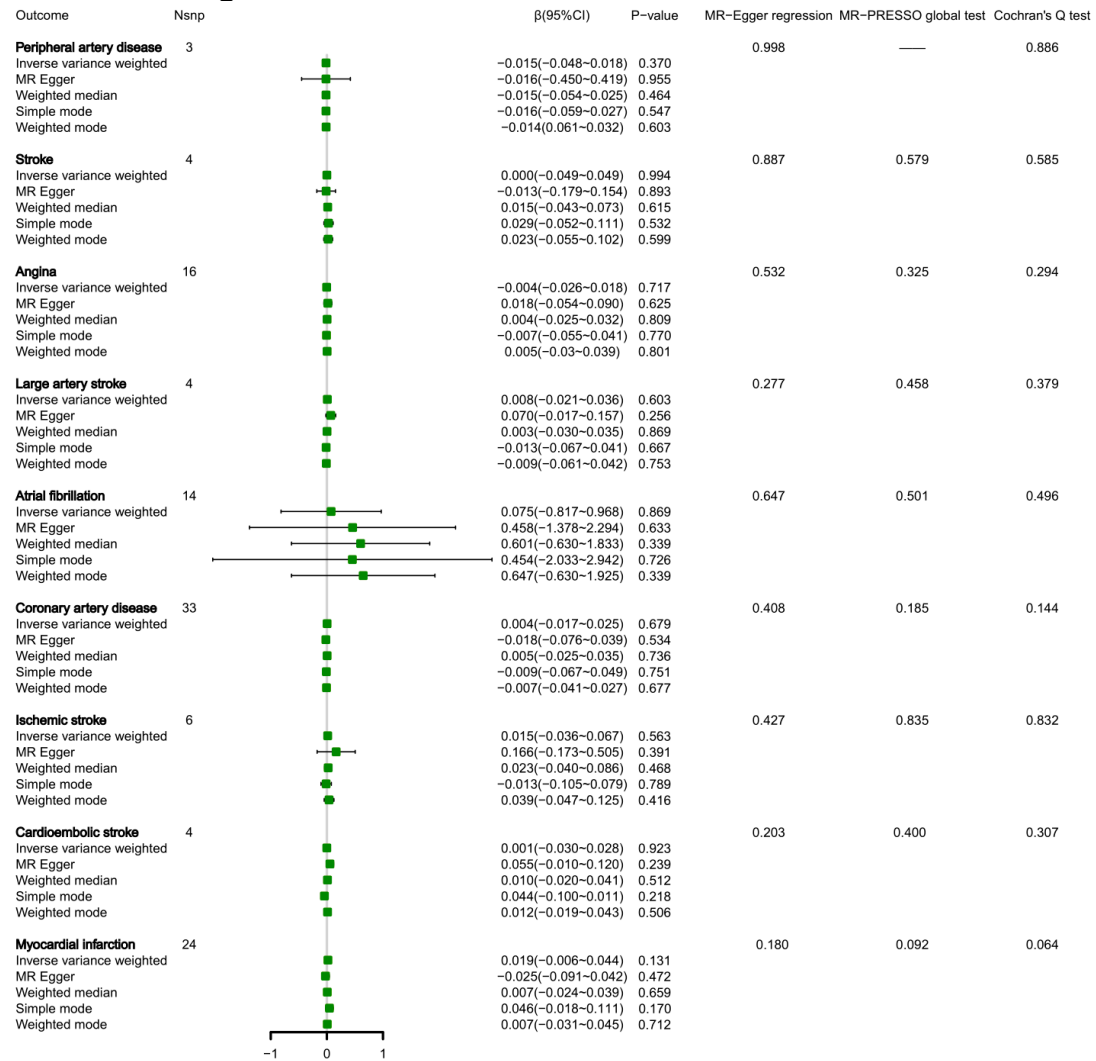

Abbreviations:  $\beta$ , beta value; CI, confidence interval, Nsnp, number of the SNPs.

**Figure S3. Forest plot of cardiovascular diseases causally associated with circulating leucine levels.**

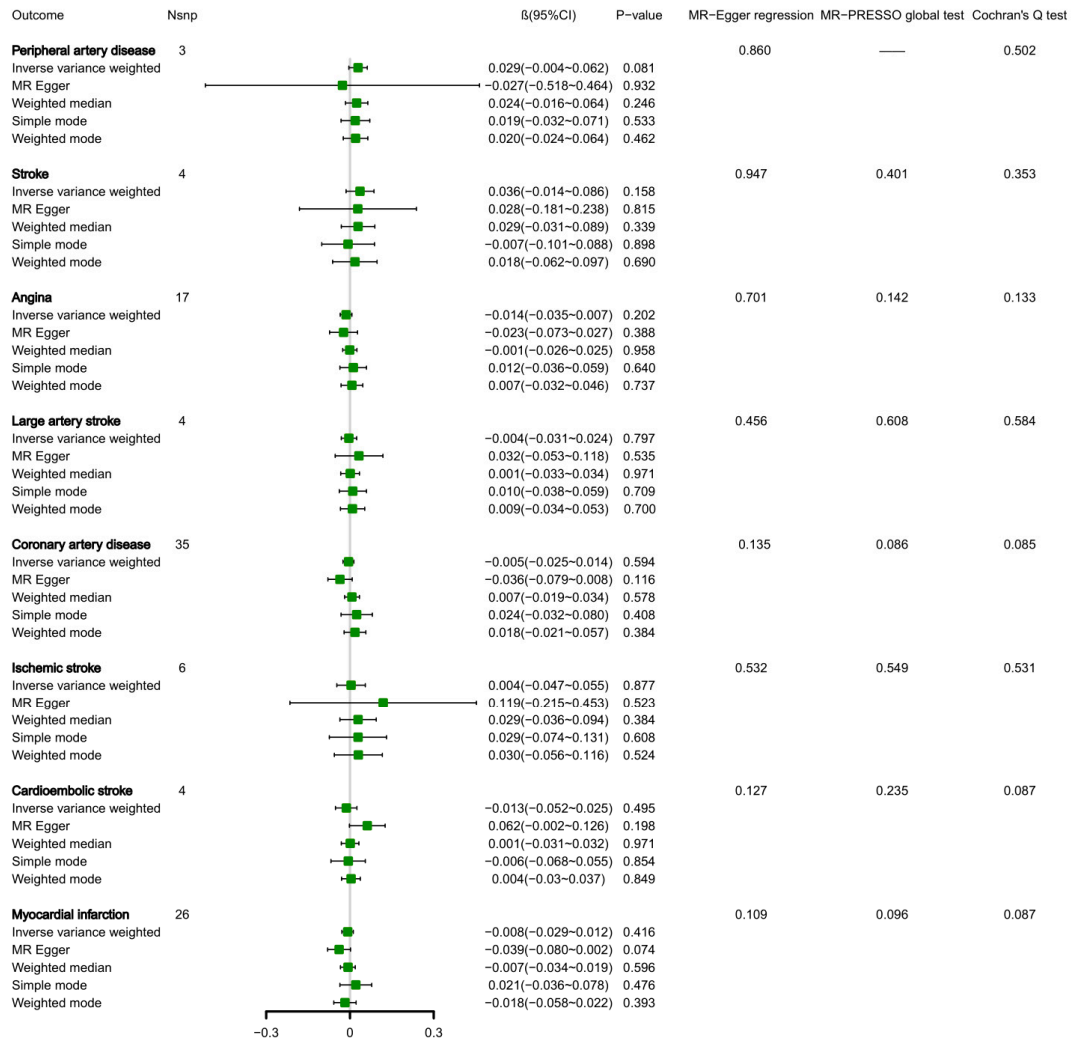

Abbreviations:  $\beta$ , beta value; CI, confidence interval, Nsnp, number of the SNPs.



**Figure S4. Forest plot of cardiovascular diseases causally associated with circulating isoleucine levels.**

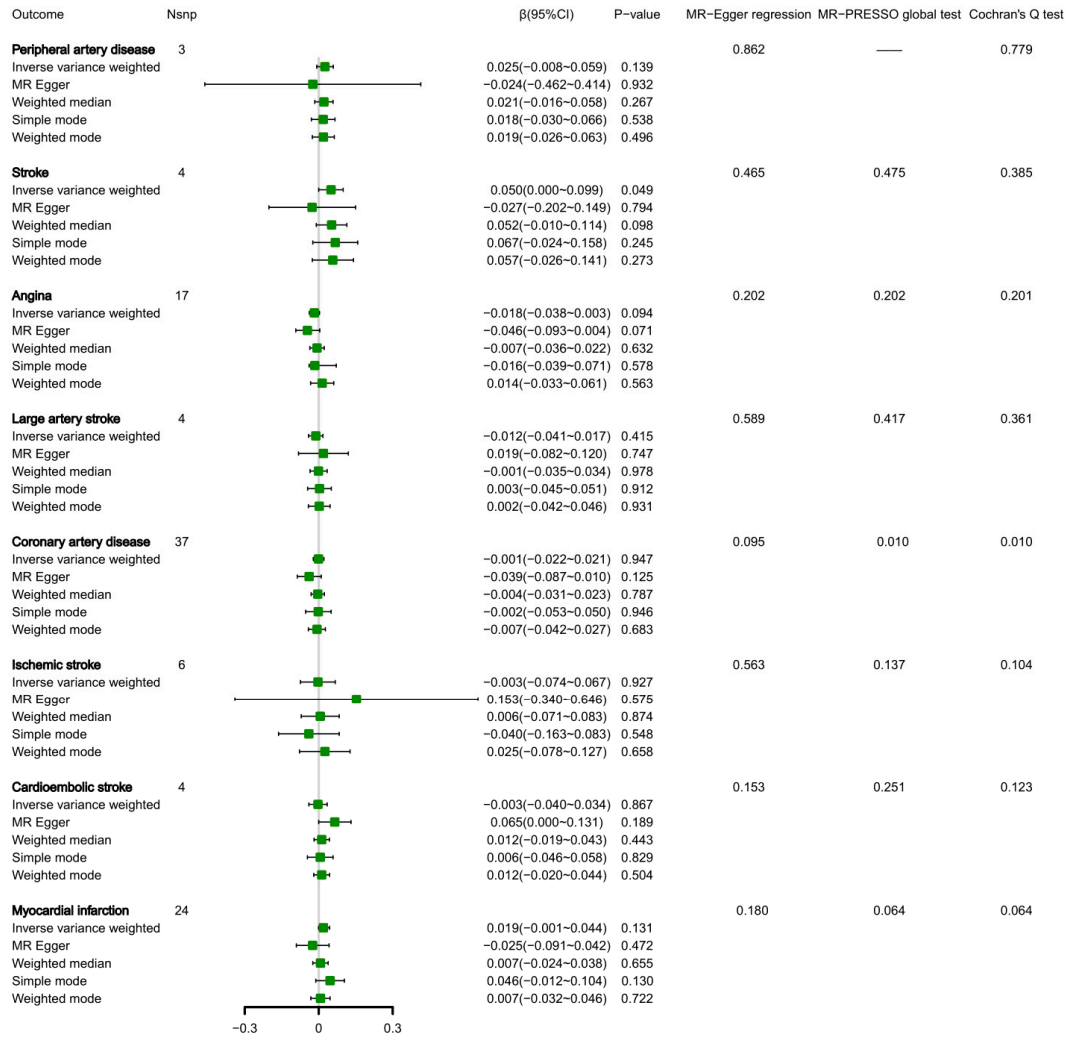

Abbreviations:  $\beta$ , beta value; CI, confidence interval, Nsnp, number of the SNPs.

**Table S6. Baseline characteristics of UK Biobank participants of serum total-BCAA levels.**

Values are means (SD) or % unless otherwise specified.

| Characteristics        | Serum Total-BCAAs levels (mmol/L) |                            |                       | P-value |
|------------------------|-----------------------------------|----------------------------|-----------------------|---------|
|                        | Tertile 1<br>(<0.346)             | Tertile 2<br>(0.346~0.416) | Tertile 3<br>(>0.416) |         |
| N                      | 2842                              | 2845                       | 2845                  |         |
| Age, y                 | 59.45±7.47                        | 59.37±7.12                 | 59.98±7.13            | 0.031   |
| Male, (%)              | 26.60                             | 35.20                      | 38.20                 | <0.001  |
| Drinking status, (%)   |                                   |                            |                       | 0.393   |
| Current                | 33.10                             | 33.40                      | 33.60                 |         |
| Previous               | 34.90                             | 31.00                      | 34.00                 |         |
| Never                  | 35.00                             | 36.40                      | 28.60                 |         |
| Missing                | 40.00                             | 30.00                      | 30.00                 |         |
| Smoking status, (%)    |                                   |                            |                       | <0.001  |
| Current                | 40.50                             | 33.20                      | 26.40                 |         |
| Previous               | 30.70                             | 34.00                      | 35.30                 |         |
| Never                  | 33.70                             | 32.80                      | 33.50                 |         |
| Missing                | 33.90                             | 32.10                      | 33.90                 |         |
| Physical activity, (%) |                                   |                            |                       | 0.037   |
| Low                    | 33.30                             | 32.90                      | 33.80                 |         |
| Medium                 | 30.50                             | 33.80                      | 35.70                 |         |
| High                   | 34.70                             | 34.30                      | 31.00                 |         |
| Household income (€)   |                                   |                            |                       | <0.001  |
| <18,000                | 38.50                             | 31.10                      | 30.40                 |         |
| 18,000~30,999          | 31.80                             | 33.30                      | 34.90                 |         |
| 31,000~51,999          | 29.10                             | 35.00                      | 35.90                 |         |
| 52,000~100,000         | 30.10                             | 35.60                      | 34.30                 |         |
| >100,000               | 21.80                             | 37.40                      | 40.80                 |         |
| Missing                | 35.40                             | 33.10                      | 31.50                 |         |
| Qualification          |                                   |                            |                       | 0.049   |
| College or             | 32.30                             | 33.90                      | 33.80                 |         |
| University             | 30.30                             | 33.30                      | 36.40                 |         |
| A levels/AS levels     | 33.80                             | 33.10                      | 33.10                 |         |
| O levels/GCSEs         | 30.20                             | 31.90                      | 37.90                 |         |
| CSEs or equivalent     | 31.30                             | 34.50                      | 34.20                 |         |
| NVQ/HND/HNC            | 35.60                             | 33.00                      | 31.40                 |         |
| None of the above      |                                   |                            |                       |         |
| BMI, kg/m <sup>2</sup> | 30.20±5.76                        | 31.77±5.73                 | 32.33±5.42            | <0.001  |
| TG, mmol/L             | 1.30±0.58                         | 1.54±0.61                  | 1.75±0.72             | <0.001  |
| TC, mmol/L             | 4.06±0.97                         | 3.99±0.97                  | 3.92±0.97             | <0.001  |
| HDL, mmol/L            | 1.21±0.32                         | 1.11±0.25                  | 1.09±0.24             | <0.001  |
| LDL, mmol/L            | 1.49±0.45                         | 1.51±0.46                  | 1.48±0.46             | 0.034   |
| HbA1c, mmol/mol        | 46.44±12.20                       | 47.88±12.73                | 50.59±14.32           | <0.001  |
| Glucose, mmol/L        | 6.35±2.41                         | 6.68±2.53                  | 7.59±3.45             | <0.001  |
| Creatinine, umol/L     | 66.36±23.63                       | 69.50±15.25                | 73.43±15.23           | <0.001  |
| Urate, umol/L          | 320.60±83.62                      | 345.45±80.79               | 350.62±80.10          | <0.001  |
| SBP, mmHg              | 144.70±18.59                      | 145.00±17.75               | 144.97±17.69          | 0.795   |
| DBP, mmHg              | 82.35±10.66                       | 83.90±10.33                | 83.64±10.29           | <0.001  |

Abbreviations: BMI, body mass index; TG, triglycerides; TC, total cholesterol; HDL, high-density lipoprotein; LDL, low-density lipoprotein; HbA1c, glycosylated hemoglobin; SBP, systolic pressure; DBP, diastolic pressure.

**Table S7. Baseline characteristics of UK Biobank participants of serum valine levels.**

| Characteristics        | Serum Valine levels (mmol/L) |                            |                       | P-value |
|------------------------|------------------------------|----------------------------|-----------------------|---------|
|                        | Tertile 1<br>(<0.203)        | Tertile 2<br>(0.203~0.238) | Tertile 3<br>(>0.238) |         |
| N                      | 2844                         | 2844                       | 2843                  |         |
| Age, y                 | 59.28±7.52                   | 59.58±7.13                 | 58.93±7.06            | 0.003   |
| Male, (%)              | 28.20                        | 34.50                      | 37.20                 | <0.001  |
| Drinking status, (%)   |                              |                            |                       | 0.130   |
| Current                | 33.20                        | 33.40                      | 33.40                 |         |
| Previous               | 34.90                        | 29.80                      | 35.30                 |         |
| Never                  | 33.80                        | 37.60                      | 28.60                 |         |
| Missing                | 50.00                        | 30.00                      | 20.00                 |         |
| Smoking status, (%)    |                              |                            |                       | <0.001  |
| Current                | 41.50                        | 32.10                      | 26.40                 |         |
| Previous               | 30.70                        | 34.20                      | 35.10                 |         |
| Never                  | 33.50                        | 32.70                      | 33.80                 |         |
| Missing                | 30.40                        | 41.10                      | 28.60                 |         |
| Physical activity, (%) |                              |                            |                       | 0.117   |
| Low                    | 33.60                        | 32.80                      | 33.60                 |         |
| Medium                 | 31.90                        | 32.50                      | 35.60                 |         |
| High                   | 33.40                        | 35.10                      | 31.50                 |         |
| Household income (€)   |                              |                            |                       | <0.001  |
| <18,000                | 38.10                        | 32.30                      | 29.70                 |         |
| 18,000~30,999          | 31.20                        | 34.50                      | 34.30                 |         |
| 31,000~51,999          | 30.10                        | 33.20                      | 36.70                 |         |
| 52,000~100,000         | 30.50                        | 34.20                      | 35.30                 |         |
| >100,000               | 22.30                        | 36.30                      | 41.30                 |         |
| Missing                | 35.60                        | 32.50                      | 31.90                 |         |
| Qualification          |                              |                            |                       | 0.032   |
| College or             | 32.30                        | 32.70                      | 35.00                 |         |
| University             | 29.60                        | 34.30                      | 36.10                 |         |
| A levels/AS levels     | 33.90                        | 33.00                      | 33.10                 |         |
| O levels/GCSEs         | 32.70                        | 30.70                      | 36.60                 |         |
| CSEs or equivalent     | 31.60                        | 35.10                      | 33.30                 |         |
| NVQ/HND/HNC            | 35.40                        | 33.60                      | 31.10                 |         |
| None of the above      |                              |                            |                       |         |
| BMI, kg/m <sup>2</sup> | 29.96±5.64                   | 31.80±5.67                 | 32.56±5.50            | <0.001  |
| TG, mmol/L             | 1.27±0.55                    | 1.54±0.58                  | 1.80±0.74             | <0.001  |
| TC, mmol/L             | 4.02±0.95                    | 3.98±0.99                  | 3.97±0.97             | 0.116   |
| HDL, mmol/L            | 1.21±0.32                    | 1.11±0.26                  | 1.10±0.24             | <0.001  |
| LDL, mmol/L            | 1.47±0.44                    | 1.51±0.46                  | 1.50±0.46             | 0.014   |
| HbA1c, mmol/mol        | 46.21±11.96                  | 47.95±12.57                | 50.76±14.61           | <0.001  |
| Glucose, mmol/L        | 6.36±2.41                    | 6.72±2.62                  | 7.54±3.40             | <0.001  |
| Creatinine, umol/L     | 66.71±23.87                  | 69.70±15.08                | 72.89±15.22           | <0.001  |
| Urate, umol/L          | 320.82±83.52                 | 344.82±80.78               | 351.06±80.26          | <0.001  |
| SBP, mmHg              | 144.31±18.56                 | 145.14±17.56               | 145.22±17.90          | 0.110   |
| DBP, mmHg              | 82.27±10.71                  | 83.62±10.26                | 84.00±10.30           | <0.001  |

Values are means (SD) or % unless otherwise specified.

Abbreviations: BMI, body mass index; TG, triglycerides; TC, total cholesterol; HDL, high-density lipoprotein; LDL, low-density lipoprotein; HbA1c, glycosylated hemoglobin; SBP, systolic pressure; DBP, diastolic pressure.

**Table S8. Baseline characteristics of UK Biobank participants of serum leucine levels.**

| Characteristics        | Serum Leucine levels (mmol/L) |                            |                       | P-value |
|------------------------|-------------------------------|----------------------------|-----------------------|---------|
|                        | Tertile 1<br>(<0.096)         | Tertile 2<br>(0.096~0.119) | Tertile 3<br>(>0.119) |         |
| N                      | 2843                          | 2842                       | 2846                  |         |
| Age, y                 | 59.62±7.35                    | 59.26±7.21                 | 58.92±7.16            | 0.001   |
| Male, (%)              | 25.30                         | 35.10                      | 39.60                 | <0.001  |
| Drinking status, (%)   |                               |                            |                       | 0.195   |
| Current                | 32.90                         | 33.40                      | 33.70                 |         |
| Previous               | 36.00                         | 31.40                      | 32.60                 |         |
| Never                  | 37.90                         | 33.80                      | 28.30                 |         |
| Missing                | 30.00                         | 30.00                      | 40.00                 |         |
| Smoking status, (%)    |                               |                            |                       | <0.001  |
| Current                | 38.60                         | 34.10                      | 27.40                 |         |
| Previous               | 31.10                         | 33.40                      | 35.50                 |         |
| Never                  | 34.00                         | 33.00                      | 33.00                 |         |
| Missing                | 36.80                         | 35.70                      | 37.50                 |         |
| Physical activity, (%) |                               |                            |                       | 0.206   |
| Low                    | 33.10                         | 33.20                      | 33.70                 |         |
| Medium                 | 31.60                         | 33.10                      | 35.30                 |         |
| High                   | 34.70                         | 33.70                      | 31.60                 |         |
| Household income (€)   |                               |                            |                       | <0.001  |
| <18,000                | 38.00                         | 32.40                      | 29.60                 |         |
| 18,000~30,999          | 31.60                         | 33.40                      | 35.00                 |         |
| 31,000~51,999          | 29.90                         | 33.40                      | 36.70                 |         |
| 52,000~100,000         | 29.90                         | 35.30                      | 34.80                 |         |
| >100,000               | 25.10                         | 31.30                      | 43.60                 |         |
| Missing                | 35.40                         | 33.50                      | 31.10                 |         |
| Qualification          |                               |                            |                       | 0.010   |
| College or             | 33.60                         | 33.60                      | 32.70                 |         |
| University             | 31.10                         | 32.40                      | 36.50                 |         |
| A levels/AS levels     | 34.70                         | 31.50                      | 33.80                 |         |
| O levels/GCSEs         | 28.00                         | 33.70                      | 38.40                 |         |
| CSEs or equivalent     | 29.50                         | 35.90                      | 34.60                 |         |
| NVQ/HND/HNC            | 34.70                         | 33.70                      | 31.60                 |         |
| None of the above      |                               |                            |                       |         |
| BMI, kg/m <sup>2</sup> | 30.54±5.96                    | 31.74±5.73                 | 32.03±5.30            | <0.001  |
| TG, mmol/L             | 1.36±0.62                     | 1.53±0.61                  | 1.71±0.70             | <0.001  |
| TC, mmol/L             | 4.07±0.98                     | 3.99±0.96                  | 3.90±0.97             | <0.001  |
| HDL, mmol/L            | 1.21±0.32                     | 1.12±0.26                  | 1.09±0.24             | <0.001  |
| LDL, mmol/L            | 1.50±0.45                     | 1.51±0.46                  | 1.47±0.45             | 0.003   |
| HbA1c, mmol/mol        | 46.92±12.39                   | 47.81±12.23                | 50.19±13.80           | <0.001  |
| Glucose, mmol/L        | 6.39±2.41                     | 6.65±2.61                  | 7.58±3.40             | <0.001  |
| Creatinine, umol/L     | 66.36±23.63                   | 69.51±15.39                | 73.42±15.09           | <0.001  |
| Urate, umol/L          | 322.21±83.73                  | 344.47±82.05               | 350.00±79.22          | <0.001  |
| SBP, mmHg              | 145.19±18.54                  | 144.89±18.17               | 144.59±18.01          | 0.450   |
| DBP, mmHg              | 82.53±10.68                   | 83.84±10.36                | 83.52±10.27           | <0.001  |

Values are means (SD) or % unless otherwise specified.

Abbreviations: BMI, body mass index; TG, triglycerides; TC, total cholesterol; HDL, high-density lipoprotein; LDL, low-density lipoprotein; HbA1c, glycosylated hemoglobin; SBP, systolic pressure; DBP, diastolic pressure.

**Table S9. Baseline characteristics of UK Biobank participants of serum isoleucine levels.**

| Characteristics         | Serum Isoleucine levels (mmol/L) |                                   |                           | P-value  |
|-------------------------|----------------------------------|-----------------------------------|---------------------------|----------|
|                         | Tertile 1<br>( $<0.046$ )        | Tertile 2<br>( $0.046\sim0.060$ ) | Tertile 3<br>( $>0.060$ ) |          |
| N                       | 2843                             | 2842                              | 2846                      |          |
| Age, y                  | 59.47 $\pm$ 7.37                 | 59.28 $\pm$ 7.23                  | 59.05 $\pm$ 7.12          | 0.092    |
| Male, (%)               | 27.40                            | 34.90                             | 37.80                     | $<0.001$ |
| Drinking status, (%)    |                                  |                                   |                           | 0.292    |
| Current                 | 33.10                            | 33.50                             | 33.40                     |          |
| Previous                | 36.00                            | 29.30                             | 34.70                     |          |
| Never                   | 34.30                            | 36.00                             | 29.80                     |          |
| Missing                 | 30.00                            | 40.00                             | 30.00                     |          |
| Smoking status, (%)     |                                  |                                   |                           | $<0.001$ |
| Current                 | 38.90                            | 33.60                             | 27.50                     |          |
| Previous                | 31.00                            | 33.70                             | 35.30                     |          |
| Never                   | 33.90                            | 33.00                             | 33.10                     |          |
| Missing                 | 37.50                            | 26.80                             | 35.70                     |          |
| Physical activity, (%)  |                                  |                                   |                           | 0.447    |
| Low                     | 33.20                            | 33.20                             | 33.60                     |          |
| Medium                  | 31.50                            | 34.00                             | 34.40                     |          |
| High                    | 34.60                            | 33.30                             | 32.10                     |          |
| Household income (€)    |                                  |                                   |                           | $<0.001$ |
| $<18,000$               | 36.90                            | 32.40                             | 30.80                     |          |
| $18,000\sim30,999$      | 31.80                            | 33.30                             | 34.90                     |          |
| $31,000\sim51,999$      | 30.80                            | 33.60                             | 35.60                     |          |
| $52,000\sim100,000$     | 30.80                            | 35.70                             | 33.40                     |          |
| $>100,000$              | 25.70                            | 31.80                             | 42.50                     |          |
| Missing                 | 35.30                            | 33.10                             | 31.60                     |          |
| Qualification           |                                  |                                   |                           | 0.011    |
| College or              | 33.20                            | 33.00                             | 33.80                     |          |
| University              | 29.60                            | 34.80                             | 35.60                     |          |
| A levels/AS levels      | 35.90                            | 30.00                             | 34.10                     |          |
| O levels/GCSEs          | 29.70                            | 35.40                             | 34.90                     |          |
| CSEs or equivalent      | 31.30                            | 35.00                             | 33.70                     |          |
| NVQ/HND/HNC             | 34.00                            | 34.50                             | 31.50                     |          |
| None of the above       |                                  |                                   |                           |          |
| BMI, kg/m <sup>2</sup>  | 30.45 $\pm$ 5.75                 | 31.72 $\pm$ 5.70                  | 32.14 $\pm$ 5.53          | $<0.001$ |
| TG, mmol/L              | 1.35 $\pm$ 0.61                  | 1.56 $\pm$ 0.64                   | 1.69 $\pm$ 0.69           | $<0.001$ |
| TC, mmol/L              | 4.08 $\pm$ 0.99                  | 4.01 $\pm$ 0.96                   | 3.88 $\pm$ 0.96           | $<0.001$ |
| HDL, mmol/L             | 1.21 $\pm$ 0.32                  | 1.12 $\pm$ 0.26                   | 1.09 $\pm$ 0.24           | $<0.001$ |
| LDL, mmol/L             | 1.51 $\pm$ 0.46                  | 1.51 $\pm$ 0.45                   | 1.46 $\pm$ 0.45           | $<0.001$ |
| HbA1c, mmol/mol         | 46.86 $\pm$ 12.20                | 47.91 $\pm$ 13.27                 | 50.14 $\pm$ 13.94         | $<0.001$ |
| Glucose, mmol/L         | 6.40 $\pm$ 2.40                  | 6.67 $\pm$ 2.60                   | 7.56 $\pm$ 3.42           | $<0.001$ |
| Creatinine, $\mu$ mol/L | 65.89 $\pm$ 21.28                | 69.89 $\pm$ 18.32                 | 73.52 $\pm$ 15.18         | $<0.001$ |
| Urate, $\mu$ mol/L      | 324.56 $\pm$ 83.28               | 341.95 $\pm$ 82.55                | 350.18 $\pm$ 79.74        | $<0.001$ |
| SBP, mmHg               | 144.75 $\pm$ 18.32               | 145.23 $\pm$ 18.00                | 144.69 $\pm$ 17.71        | 0.457    |
| DBP, mmHg               | 82.78 $\pm$ 10.52                | 83.85 $\pm$ 10.64                 | 83.25 $\pm$ 10.16         | 0.001    |

Values are means (SD) or % unless otherwise specified.

Abbreviations: BMI, body mass index; TG, triglycerides; TC, total cholesterol; HDL, high-density lipoprotein; LDL, low-density lipoprotein; HbA1c, glycosylated hemoglobin; SBP, systolic pressure; DBP, diastolic pressure.

**Table S10. Association between baseline circulating BCAAs in relation to the prevalence of multiple cardiovascular diseases.**

| Serum Total BCAAs levels (mmol/L)  |                              |                              |                              |         |
|------------------------------------|------------------------------|------------------------------|------------------------------|---------|
|                                    | Tertile1<br>(<0.346)         | Tertile2<br>(0.346~0.416)    | Tertile3<br>(>0.416)         |         |
|                                    | Prevalence ratio<br>(95% CI) | Prevalence ratio<br>(95% CI) | Prevalence ratio<br>(95% CI) | p-trend |
| <b>Ischemic stroke</b>             |                              |                              |                              |         |
| Model 1                            | Reference                    | 1.241 (0.919~1.676)          | 1.259 (0.931~1.703)          | 0.143   |
| Model 2                            | Reference                    | 1.251 (0.924~1.693)          | 1.267 (0.933~1.721)          | 0.139   |
| Model 3                            | Reference                    | 1.248 (0.922~1.689)          | 1.261 (0.929~1.712)          | 0.148   |
| <b>Subarachnoid hemorrhage</b>     |                              |                              |                              |         |
| Model 1                            | Reference                    | 2.426 (0.440~13.374)         | 3.364 (0.639~17.693)         | 0.147   |
| Model 2                            | Reference                    | 2.338 (0.418~13.063)         | 3.212 (0.600~17.176)         | 0.169   |
| Model 3                            | Reference                    | 2.319 (0.414~12.942)         | 3.195 (0.596~17.116)         | 0.171   |
| <b>Intracerebral hemorrhage</b>    |                              |                              |                              |         |
| Model 1                            | Reference                    | 1.010 (0.458~2.229)          | 1.671 (0.817~3.418)          | 0.132   |
| Model 2                            | Reference                    | 0.988 (0.445~2.194)          | 1.647 (0.796~3.407)          | 0.144   |
| Model 3                            | Reference                    | 0.998 (0.450~2.215)          | 1.643 (0.794~3.398)          | 0.147   |
| <b>Coronary artery disease</b>     |                              |                              |                              |         |
| Model 1                            | Reference                    | 1.060 (0.928~1.212)          | 1.160 (1.015~1.324)          | 0.028*  |
| Model 2                            | Reference                    | 1.011 (0.883~1.157)          | 1.092 (0.954~1.251)          | 0.193   |
| Model 3                            | Reference                    | 1.009 (0.881~1.156)          | 1.083 (0.945~1.241)          | 0.240   |
| <b>Myocardial infarction</b>       |                              |                              |                              |         |
| Model 1                            | Reference                    | 1.207 (0.939~1.551)          | 1.214 (0.943~1.563)          | 0.141   |
| Model 2                            | Reference                    | 1.186 (0.921~1.527)          | 1.185 (0.918~1.531)          | 0.207   |
| Model 3                            | Reference                    | 1.184 (0.920~1.525)          | 1.182 (0.915~1.527)          | 0.213   |
| <b>Peripheral arterial disease</b> |                              |                              |                              |         |
| Model 1                            | Reference                    | 1.019 (0.778~1.334)          | 0.800 (0.600~1.066)          | 0.130   |
| Model 2                            | Reference                    | 1.049 (0.798~1.378)          | 0.832 (0.621~1.113)          | 0.218   |
| Model 3                            | Reference                    | 1.047 (0.797~1.377)          | 0.826 (0.617~1.107)          | 0.202   |
| <b>Heart failure</b>               |                              |                              |                              |         |
| Model 1                            | Reference                    | 1.000 (0.834~1.198)          | 1.000 (0.832~1.200)          | 0.996   |
| Model 2                            | Reference                    | 0.915 (0.761~1.101)          | 0.899 (0.746~1.085)          | 0.272   |
| Model 3                            | Reference                    | 0.912 (0.758~1.097)          | 0.894 (0.741~1.078)          | 0.246   |
| <b>Angina</b>                      |                              |                              |                              |         |
| Model 1                            | Reference                    | 1.080 (0.912~1.280)          | 1.130 (0.954~1.339)          | 0.160   |
| Model 2                            | Reference                    | 1.038 (0.875~1.232)          | 1.074 (0.905~1.276)          | 0.414   |
| Model 3                            | Reference                    | 1.036 (0.873~1.230)          | 1.067 (0.898~1.267)          | 0.464   |

Model 1 adjusted for sex, age, smoking, drinking. Model 2 adjusted for Model 1 and Townsend deprivation index, average total annual household income, physical activity, qualifications, BMI. Model 3 adjusted for Model 2 plus the history of high cholesterol, the history of hypertension.

**Table S11. Association between baseline circulating Valine in relation to the prevalence of multiple cardiovascular diseases.**

| Serum Valine levels (mmol/L)       |                              |                              |                              |         |
|------------------------------------|------------------------------|------------------------------|------------------------------|---------|
|                                    | Tertile1<br>(<0.203)         | Tertile2 (0.203~0.238)       | Tertile3<br>(>0.238)         |         |
|                                    | Prevalence ratio<br>(95% CI) | Prevalence ratio<br>(95% CI) | Prevalence ratio<br>(95% CI) | p-trend |
| <b>Ischemic stroke</b>             |                              |                              |                              |         |
| Model 1                            | Reference                    | 1.346 (1.001~1.809)          | 1.213 (0.894~1.646)          | 0.233   |
| Model 2                            | Reference                    | 1.354 (1.004~1.827)          | 1.225 (0.898~1.672)          | 0.224   |
| Model 3                            | Reference                    | 1.353 (1.003~1.825)          | 1.226 (0.898~1.673)          | 0.223   |
| <b>Subarachnoid hemorrhage</b>     |                              |                              |                              |         |
| Model 1                            | Reference                    | 2.348 (0.426~12.933)         | 3.244 (0.619~16.986)         | 0.159   |
| Model 2                            | Reference                    | 2.259 (0.403~12.654)         | 3.105 (0.579~16.661)         | 0.183   |
| Model 3                            | Reference                    | 2.219 (0.396~12.450)         | 3.068 (0.571~16.486)         | 0.188   |
| <b>Intracerebral hemorrhage</b>    |                              |                              |                              |         |
| Model 1                            | Reference                    | 1.016 (0.462~2.237)          | 1.701 (0.835~3.467)          | 0.119   |
| Model 2                            | Reference                    | 1.003 (0.453~2.223)          | 1.677 (0.810~3.472)          | 0.133   |
| Model 3                            | Reference                    | 1.016 (0.458~2.252)          | 1.688 (0.815~3.495)          | 0.130   |
| <b>Coronary artery disease</b>     |                              |                              |                              |         |
| Model 1                            | Reference                    | 1.064 (0.932~1.216)          | 1.183 (1.036~1.350)          | 0.012*  |
| Model 2                            | Reference                    | 1.002 (0.876~1.148)          | 1.099 (0.960~1.259)          | 0.161   |
| Model 3                            | Reference                    | 1.001 (0.874~1.147)          | 1.100 (0.960~1.260)          | 0.161   |
| <b>Myocardial infarction</b>       |                              |                              |                              |         |
| Model 1                            | Reference                    | 1.109 (0.863~1.425)          | 1.217 (0.949~1.560)          | 0.121   |
| Model 2                            | Reference                    | 1.083 (0.841~1.394)          | 1.182 (0.918~1.523)          | 0.193   |
| Model 3                            | Reference                    | 1.080 (0.838~1.391)          | 1.181 (0.917~1.521)          | 0.195   |
| <b>Peripheral arterial disease</b> |                              |                              |                              |         |
| Model 1                            | Reference                    | 1.037 (0.793~1.356)          | 0.820 (0.615~1.092)          | 0.182   |
| Model 2                            | Reference                    | 1.068 (0.814~1.402)          | 0.858 (0.640~1.150)          | 0.312   |
| Model 3                            | Reference                    | 1.067 (0.812~1.402)          | 0.860 (0.641~1.154)          | 0.323   |
| <b>Heart failure</b>               |                              |                              |                              |         |
| Model 1                            | Reference                    | 0.984 (0.820~1.180)          | 1.084 (0.904~1.299)          | 0.382   |
| Model 2                            | Reference                    | 0.880 (0.731~1.060)          | 0.950 (0.789~1.145)          | 0.621   |
| Model 3                            | Reference                    | 0.877 (0.728~1.057)          | 0.950 (0.788~1.146)          | 0.623   |
| <b>Angina</b>                      |                              |                              |                              |         |
| Model 1                            | Reference                    | 1.107 (0.935~1.312)          | 1.174 (0.992~1.390)          | 0.063   |
| Model 2                            | Reference                    | 1.054 (0.888~1.252)          | 1.105 (0.930~1.313)          | 0.257   |
| Model 3                            | Reference                    | 1.053 (0.887~1.250)          | 1.105 (0.929~1.313)          | 0.259   |

Model 1 adjusted for sex, age, smoking, drinking. Model 2 adjusted for Model 1 and Townsend deprivation index, average total annual household income, physical activity, qualifications, BMI. Model 3 adjusted for Model 2 plus the history of high cholesterol, the history of hypertension.

**Table S12. Association between baseline circulating Leucine in relation to the prevalence of multiple cardiovascular diseases.**

| Serum Leucine levels (mmol/L)      |                              |                              |                              |             |
|------------------------------------|------------------------------|------------------------------|------------------------------|-------------|
|                                    | Tertile1<br>(<0.096)         | Tertile2<br>(0.096~0.119)    | Tertile3<br>(>0.119)         |             |
|                                    | Prevalence ratio<br>(95% CI) | Prevalence ratio<br>(95% CI) | Prevalence ratio<br>(95% CI) | p-<br>trend |
| <b>Ischemic stroke</b>             |                              |                              |                              |             |
| Model 1                            | Reference                    | 1.155 (0.858~1.554)          | 1.123 (0.831~1.519)          | 0.463       |
| Model 2                            | Reference                    | 1.150 (0.854~1.551)          | 1.124 (0.830~1.523)          | 0.464       |
| Model 3                            | Reference                    | 1.144 (0.848~1.541)          | 1.118 (0.825~1.515)          | 0.485       |
| <b>Subarachnoid hemorrhage</b>     |                              |                              |                              |             |
| Model 1                            | Reference                    | 2.458 (0.445~13.574)         | 3.452 (0.653~18.253)         | 0.140       |
| Model 2                            | Reference                    | 2.352 (0.423~13.082)         | 3.385 (0.635~18.061)         | 0.148       |
| Model 3                            | Reference                    | 2.330 (0.419~12.963)         | 3.388 (0.634~18.114)         | 0.148       |
| <b>Intracerebral hemorrhage</b>    |                              |                              |                              |             |
| Model 1                            | Reference                    | 0.783 (0.348~1.761)          | 1.589 (0.791~3.193)          | 0.143       |
| Model 2                            | Reference                    | 0.780 (0.346~1.761)          | 1.577 (0.780~3.186)          | 0.150       |
| Model 3                            | Reference                    | 0.783 (0.347~1.766)          | 1.564 (0.774~3.159)          | 0.157       |
| <b>Coronary artery disease</b>     |                              |                              |                              |             |
| Model 1                            | Reference                    | 1.052 (0.919~1.203)          | 1.187 (1.039~1.357)          | 0.011*      |
| Model 2                            | Reference                    | 1.007 (0.879~1.154)          | 1.137 (0.993~1.301)          | 0.057       |
| Model 3                            | Reference                    | 0.999 (0.872~1.145)          | 1.126 (0.983~1.290)          | 0.077       |
| <b>Myocardial infarction</b>       |                              |                              |                              |             |
| Model 1                            | Reference                    | 1.106 (0.862~1.419)          | 1.104 (0.859~1.420)          | 0.449       |
| Model 2                            | Reference                    | 1.080 (0.841~1.388)          | 1.081 (0.839~1.393)          | 0.555       |
| Model 3                            | Reference                    | 1.076 (0.838~1.383)          | 1.079 (0.838~1.391)          | 0.564       |
| <b>Peripheral arterial disease</b> |                              |                              |                              |             |
| Model 1                            | Reference                    | 1.219 (0.925~1.607)          | 0.976 (0.730~1.305)          | 0.837       |
| Model 2                            | Reference                    | 1.233 (0.933~1.629)          | 1.006 (0.750~1.350)          | 0.995       |
| Model 3                            | Reference                    | 1.219 (0.922~1.612)          | 1.004 (0.747~1.347)          | 0.984       |
| <b>Heart failure</b>               |                              |                              |                              |             |
| Model 1                            | Reference                    | 1.070 (0.894~1.281)          | 0.947 (0.786~1.141)          | 0.562       |
| Model 2                            | Reference                    | 0.995 (0.829~1.195)          | 0.881 (1.055~1.066)          | 0.188       |
| Model 3                            | Reference                    | 0.988 (0.823~1.187)          | 0.877 (0.726~1.061)          | 0.173       |
| <b>Angina</b>                      |                              |                              |                              |             |
| Model 1                            | Reference                    | 1.112 (0.937~1.322)          | 1.240 (1.045~1.471)          | 0.013*      |
| Model 2                            | Reference                    | 1.073 (0.902~1.276)          | 1.194 (1.005~1.419)          | 0.041*      |
| Model 3                            | Reference                    | 1.066 (0.896~1.268)          | 1.185 (0.998~1.408)          | 0.051       |

Model 1 adjusted for sex, age, smoking, drinking. Model 2 adjusted for Model 1 and Townsend deprivation index, average total annual household income, physical activity, qualifications, BMI. Model 3 adjusted for Model 2 plus the history of high cholesterol, the history of hypertension.



**Table S13. Association between baseline circulating Isoleucine in relation to the prevalence of multiple cardiovascular diseases.**

| Serum Isoleucine levels (mmol/L)   |                              |                              |                              |         |
|------------------------------------|------------------------------|------------------------------|------------------------------|---------|
|                                    | Tertile1<br>(<0.046)         | Tertile2<br>(0.046~0.060)    | Tertile3<br>(>0.060)         |         |
|                                    | Prevalence ratio<br>(95% CI) | Prevalence ratio<br>(95% CI) | Prevalence ratio<br>(95% CI) | p-trend |
| <b>Ischemic stroke</b>             |                              |                              |                              |         |
| Model 1                            | Reference                    | 1.017 (0.749~1.381)          | 1.320 (0.986~1.766)          | 0.055   |
| Model 2                            | Reference                    | 1.013 (0.745~1.377)          | 1.323 (0.986~1.775)          | 0.054   |
| Model 3                            | Reference                    | 1.012 (0.744~1.376)          | 1.313 (0.979~1.763)          | 0.061   |
| <b>Subarachnoid hemorrhage</b>     |                              |                              |                              |         |
| Model 1                            | Reference                    | 7.026 (0.841~58.713)         | 5.120 (0.566~46.325)         | 0.165   |
| Model 2                            | Reference                    | 6.906 (0.822~58.059)         | 4.979 (0.546~45.382)         | 0.182   |
| Model 3                            | Reference                    | 6.883 (0.818~57.915)         | 4.988 (0.546~45.581)         | 0.182   |
| <b>Intracerebral hemorrhage</b>    |                              |                              |                              |         |
| Model 1                            | Reference                    | 0.866 (0.380~1.973)          | 1.849 (0.915~3.736)          | 0.058   |
| Model 2                            | Reference                    | 0.863 (0.378~1.974)          | 1.831 (0.900~3.725)          | 0.063   |
| Model 3                            | Reference                    | 0.865 (0.378~1.978)          | 1.805 (0.888~3.670)          | 0.069   |
| <b>Coronary artery disease</b>     |                              |                              |                              |         |
| Model 1                            | Reference                    | 1.085 (0.950~1.239)          | 1.148 (1.006~1.311)          | 0.042*  |
| Model 2                            | Reference                    | 1.041 (0.910~1.191)          | 1.094 (0.957~1.252)          | 0.188   |
| Model 3                            | Reference                    | 1.039 (0.908~1.190)          | 1.080 (0.943~1.236)          | 0.265   |
| <b>Myocardial infarction</b>       |                              |                              |                              |         |
| Model 1                            | Reference                    | 1.190 (0.928~1.526)          | 1.147 (0.892~1.476)          | 0.299   |
| Model 2                            | Reference                    | 1.163 (0.906~1.492)          | 1.122 (0.870~1.446)          | 0.393   |
| Model 3                            | Reference                    | 1.163 (0.906~1.493)          | 1.119 (0.868~1.443)          | 0.403   |
| <b>Peripheral arterial disease</b> |                              |                              |                              |         |
| Model 1                            | Reference                    | 1.106 (0.837~1.463)          | 1.085 (0.818~1.440)          | 0.580   |
| Model 2                            | Reference                    | 1.113 (0.840~1.475)          | 1.116 (0.838~1.485)          | 0.460   |
| Model 3                            | Reference                    | 1.113 (0.840~1.476)          | 1.108 (0.832~1.476)          | 0.491   |
| <b>Heart failure</b>               |                              |                              |                              |         |
| Model 1                            | Reference                    | 1.126 (0.941~1.346)          | 0.979 (0.813~1.178)          | 0.813   |
| Model 2                            | Reference                    | 1.050 (0.875~1.260)          | 0.901 (0.746~1.089)          | 0.272   |
| Model 3                            | Reference                    | 1.048 (0.873~1.258)          | 0.894 (0.740~1.080)          | 0.237   |
| <b>Angina</b>                      |                              |                              |                              |         |
| Model 1                            | Reference                    | 1.166 (0.985~1.380)          | 1.120 (0.945~1.329)          | 0.204   |
| Model 2                            | Reference                    | 1.125 (0.950~1.333)          | 1.075 (0.905~1.278)          | 0.432   |
| Model 3                            | Reference                    | 1.124 (0.949~1.333)          | 1.064 (0.896~1.265)          | 0.507   |

Model 1 adjusted for sex, age, smoking, drinking. Model 2 adjusted for Model 1 and Townsend deprivation index, average total annual household income, physical activity, qualifications, BMI. Model 3 adjusted for Model 2 plus the history of high cholesterol, the history of hypertension.
